# Supplementary material
Source: MDPI journal article supplement (https://www.mdpi.com/2227-9717/10/7/1347)
Supplement: s1 [file s1]

Article

# Overview on Recent Trends in Liquid Phase-Based Microextraction Techniques

Basit Olayanju <sup>1</sup>, Abuzar Kabir <sup>1,2</sup>; Rosa Perestrelo <sup>3</sup>; Jorge A. M. Pereira <sup>3</sup>; José S. Câmara <sup>3,4,\*</sup>

<sup>1</sup> Department of Chemistry and Biochemistry, Florida International University, Miami, FL, USA

<sup>2</sup> Department of Pharmacy, Faculty of Allied Health Science, Daffodil International University, Dhaka-1207, Bangladesh akabir@fiu.edu

<sup>3</sup> CQM - Centro de Química da Madeira, NPRG, Universidade da Madeira, Campus Universitário da Penteada, 9020-105, Funchal, Portugal; rmp@staff.uma.pt (R.P.), jorge.pereira@staff.uma.pt (J.A.M.P.),

<sup>4</sup> Departamento de Química, Faculdade de Ciências Exatas e Engenharia, Universidade da Madeira, Campus da Penteada, 9020-105 Funchal, Portugal; jsc@staff.uma.pt

## SUPPLEMENTARY MATERIAL

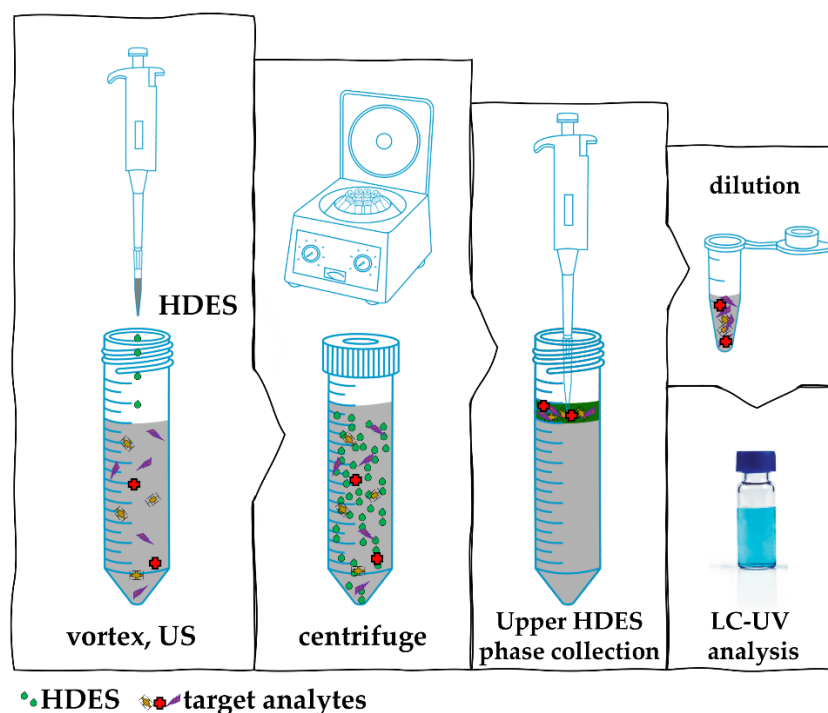

**Figure 1.** SM. Schematic illustrations of the experimental procedure of UA-HDES-DLLME (adapted from Qiao, Sun, Yu, Tao and Yan [1]).

## References

1. Qiao, L.; Sun, R.; Yu, C.; Tao, Y.; Yan, Y. Novel hydrophobic deep eutectic solvents for ultrasound-assisted dispersive liquid-liquid microextraction of trace non-steroidal anti-inflammatory drugs in water and milk samples. *Microchem. J.* **2021**, *170*, 106686, doi:10.1016/j.microc.2021.106686.
